# Supplementary material for: Highly exposed Fe–N4active sites in porous poly-iron-phthalocyanine based oxygen reduction electrocatalyst with ultrahigh performance for air cathode
Source: Royal Society of Chemistry journal article supplement (doi:10.1039/c6dt04705j), 2016-12-29
Supplement: c6dt04705j1.pdf [file c6dt04705j1.pdf]

## Supporting Information

# Highly Exposed Fe-N<sub>4</sub> Active Sites in Porous Poly-Iron-Phthalocyanine based Oxygen Reduction Electrocatalyst with Ultrahigh Performance for Air Cathode

*Ganesan Anandhababu<sup>1</sup>, Syed Comail Abbas<sup>1</sup>, Jiangquan Lv, Kui Ding, Qin Liu, Dickson D.*

*Babu, Yiyin Huang, Jiafang Xie, Maoxiang Wu, and Yaobing Wang\**

*Key Laboratory of Design and Assembly of Functional Nanostructures, Fujian Provincial Key Laboratory of Nanomaterials, Fujian Institute of Research on the Structure of Matter, Chinese Academy of Sciences, 155 Yangqiao Road West, Fuzhou, 350002, Fujian, P. R. China.*

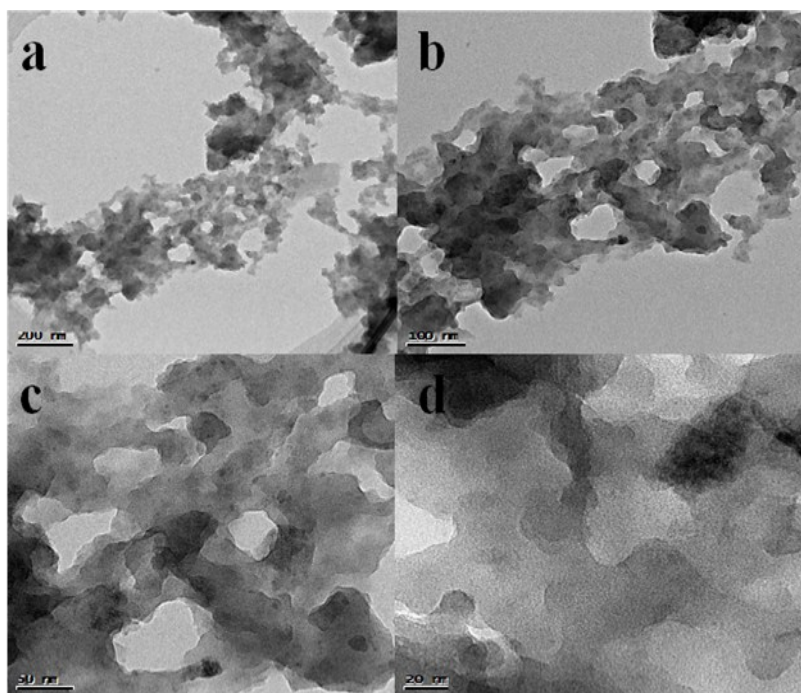

**Fig. S1** TEM images of PFe-Pc electrocatalyst.

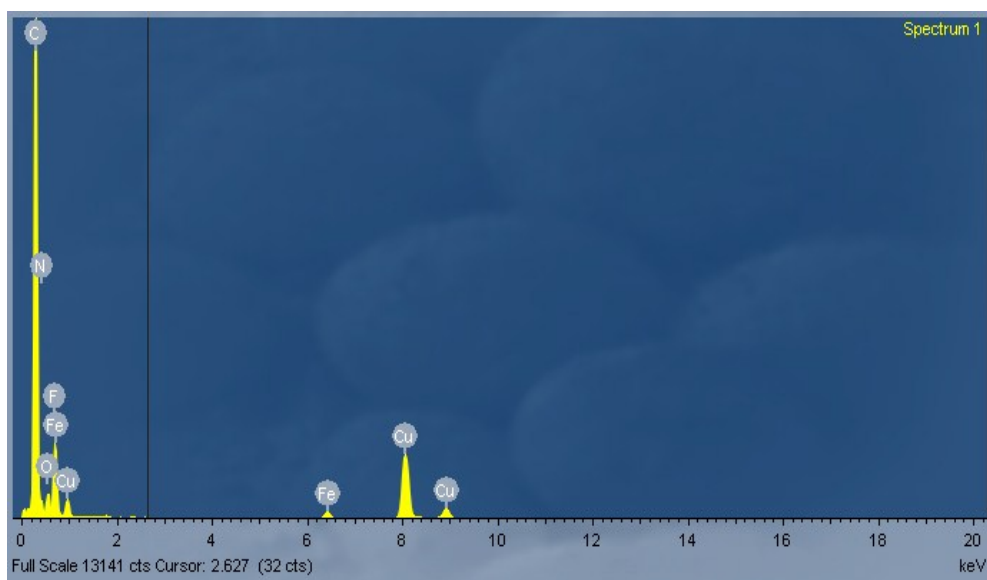

**Fig. S2** EDX spectrum of PFe-Pc electrocatalyst. The Cu signals were from the copper grid used in the TEM test.

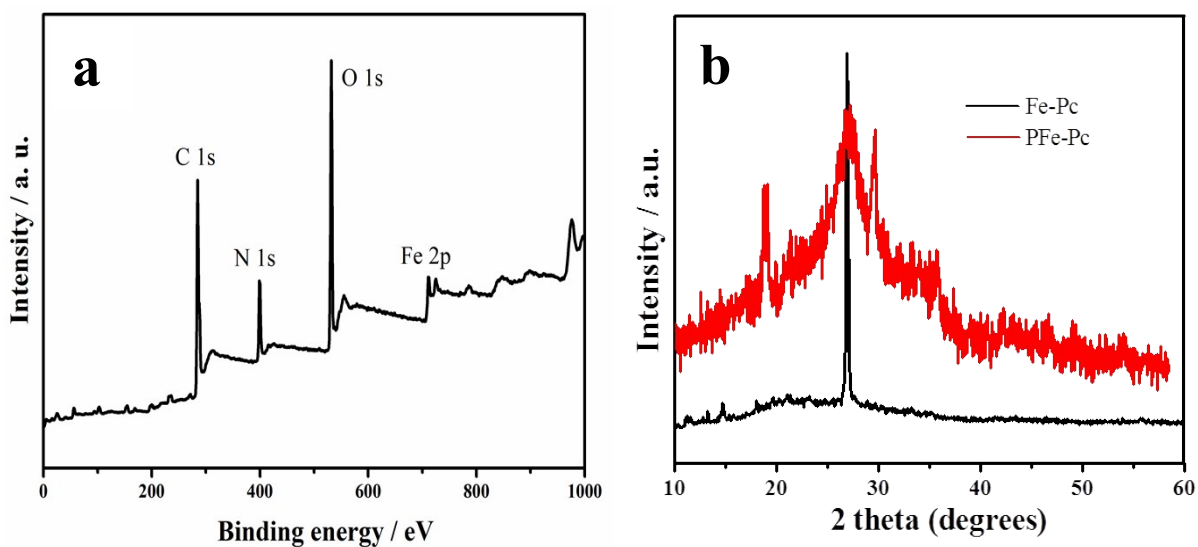

**Fig. S3** (a) XPS survey spectrum of PFe-Pc and (b) XRD patterns of PFe-Pc electrocatalyst.

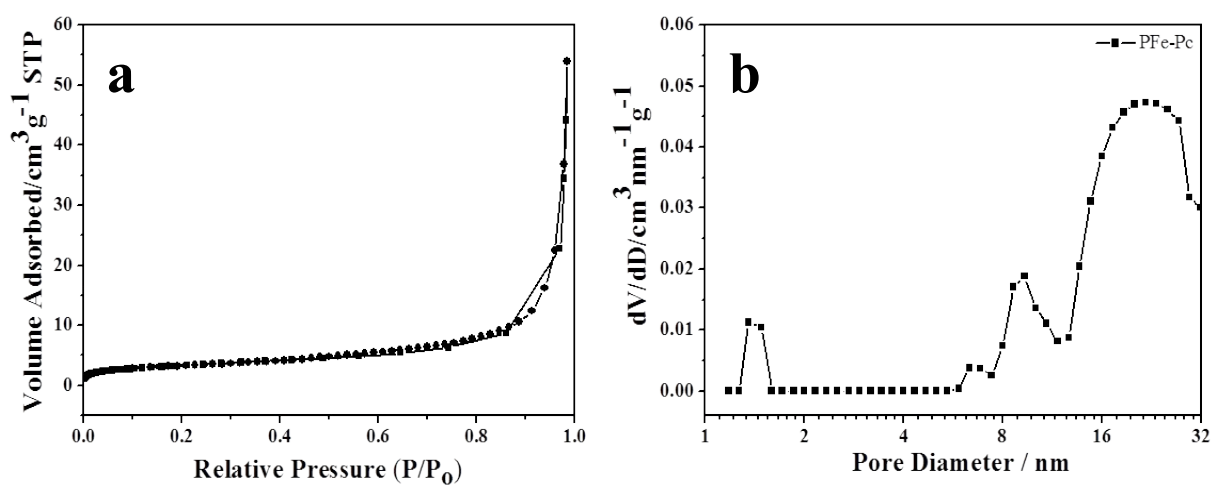

**Fig. S4** (a) N<sub>2</sub> adsorption-desorption isotherms and (b) pore size distributions of PFe-Pc electrocatalyst.

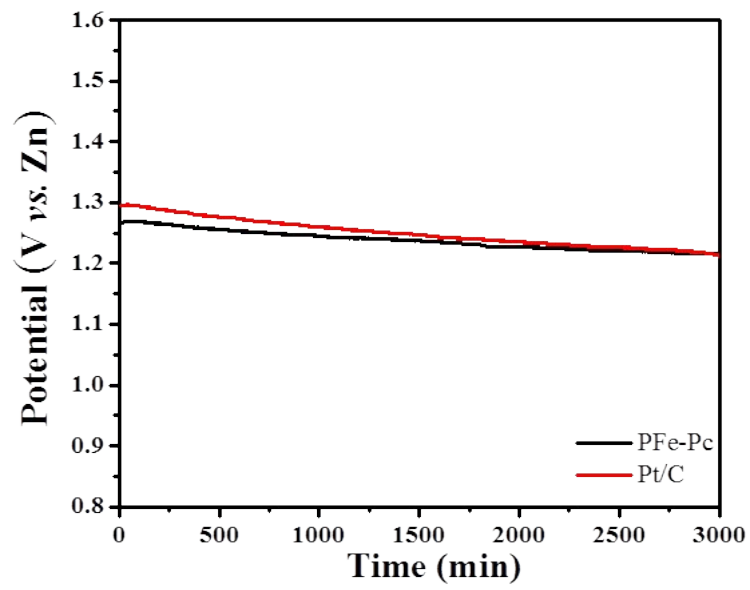

**Fig. S5** Stability curve of Zn-air cells with PFe-Pc and Pt/C as cathode electrocatalysts at current density of  $10 \text{ mA cm}^{-2}$
